# Supplementary material
Source: MDPI journal article supplement (https://www.mdpi.com/2073-4395/13/5/1194)
Supplement: s1 [file s1]

**Table S1 Irrigation Technology and Genetics Significant Interactions on Corn Quality**

Corn quality values are shown by site-year that were significantly affected by the interaction of irrigation technology and crop genetics. Parameters and site years without significance (F test greater than 0.05) were omitted from the table. Mean separations are shown by letters.

| ADF         |          |          |          |                |           | TDN      |          |          |                |           |
|-------------|----------|----------|----------|----------------|-----------|----------|----------|----------|----------------|-----------|
|             | Factor 1 | Factor 2 | Estimate | Standard Error | Mean Sep. | Factor 1 | Factor 2 | Estimate | Standard Error | Mean Sep. |
| Logan 2019  | MESA     | DT       | 21.197   | 0.88           | A         |          |          |          |                |           |
|             | MESA     | Non-DT   | 17.792   | 0.841          | BC        |          |          |          |                |           |
|             | LESA     | DT       | 19.152   | 0.841          | ABC       |          |          |          |                |           |
|             | LESA     | Non-DT   | 17.398   | 0.841          | C         |          |          |          |                |           |
|             | MDI      | DT       | 18.036   | 0.841          | BC        |          |          |          |                |           |
|             | MDI      | Non-DT   | 18.947   | 0.841          | ABC       |          |          |          |                |           |
|             | LEPA     | DT       | 20.455   | 0.841          | A         |          |          |          |                |           |
|             | LEPA     | Non-DT   | 20.419   | 0.841          | A         |          |          |          |                |           |
|             | LENA     | DT       | 17.148   | 0.665          | C         |          |          |          |                |           |
| Logan 2020  | LENA     | Non-DT   | 19.847   | 0.796          | AB        |          |          |          |                |           |
|             |          |          |          |                |           | MESA     | DT       | 24.055   | 1.111          | CD        |
|             |          |          |          |                |           | MESA     | Non-DT   | 23.553   | 1.111          | CD        |
|             |          |          |          |                |           | LESA     | DT       | 23.728   | 1.111          | CD        |
|             |          |          |          |                |           | LESA     | Non-DT   | 28.325   | 1.111          | AB        |
|             |          |          |          |                |           | MDI      | DT       | 24.546   | 1.111          | CD        |
|             |          |          |          |                |           | MDI      | Non-DT   | 25.515   | 1.111          | BC        |
|             |          |          |          |                |           | LEPA     | DT       | 24.403   | 1.111          | CD        |
|             |          |          |          |                |           | LEPA     | Non-DT   | 29.35    | 1.111          | A         |
| Vernal 2020 |          |          |          |                |           | LENA     | DT       | 22.1     | 0.853          | D         |
|             |          |          |          |                |           | LENA     | Non-DT   | 23.634   | 0.853          | CD        |
|             | MESA     | DT       | 24.88    | 1.04           | A         |          |          |          |                |           |
|             | MESA     | Non-DT   | 22.247   | 1.091          | B         |          |          |          |                |           |
|             | LESA     | DT       | 25.076   | 1.054          | AB        |          |          |          |                |           |
|             | LESA     | Non-DT   | 25.934   | 1.054          | A         |          |          |          |                |           |
|             | MDI      | DT       | 15.758   | 1.054          | C         |          |          |          |                |           |
|             | MDI      | Non-DT   | 17.27    | 1.054          | C         |          |          |          |                |           |
|             | LEPA     | DT       | 25.95    | 1.054          | A         |          |          |          |                |           |
|             | LEPA     | Non-DT   | 24.675   | 1.054          | AB        |          |          |          |                |           |

**Table S2 Irrigation Rate and Genetics Significant Interactions on Corn Quality – P1**

Corn quality values are shown by site-year that were significantly affected by an interaction of irrigation rate and crop genetics. Parameters and site years without significance (F test greater than 0.05) were omitted from the table. Mean separations are shown by letters.

|             | Crude Protein |          |          |                |           | ADF      |          |          |                |           |
|-------------|---------------|----------|----------|----------------|-----------|----------|----------|----------|----------------|-----------|
|             | Factor 1      | Factor 2 | Estimate | Standard Error | Mean Sep. | Factor 1 | Factor 2 | Estimate | Standard Error | Mean Sep. |
| Logan 2020  |               |          |          |                |           | 100      | DT       | 31.836   | 0.896          | A         |
|             |               |          |          |                |           | 100      | Non-DT   | 29.023   | 0.896          | BCD       |
|             |               |          |          |                |           | 75       | DT       | 29.405   | 0.896          | ABC       |
|             |               |          |          |                |           | 75       | Non-DT   | 29.743   | 0.896          | AB        |
|             |               |          |          |                |           | 50       | DT       | 26.91    | 0.896          | CDE       |
|             |               |          |          |                |           | 50       | Non-DT   | 26.738   | 0.896          | DE        |
|             |               |          |          |                |           | 50T      | DT       | 26.475   | 0.896          | E         |
|             |               |          |          |                |           | 50T      | Non-DT   | 27.775   | 0.893          | BCDE      |
|             |               |          |          |                |           |          |          |          |                |           |
|             |               |          |          |                |           |          |          |          |                |           |
| Vernal 2020 | 100           | DT       | 22.68    | 0.478          | ABC       | 100      | DT       | 26.096   | 1.054          | A         |
|             | 100           | Non-DT   | 23.128   | 0.478          | AB        | 100      | Non-DT   | 27.357   | 1.054          | A         |
|             | 75            | DT       | 23.355   | 0.478          | A         | 75       | DT       | 24.511   | 1.054          | A         |
|             | 75            | Non-DT   | 22.079   | 0.478          | BCD       | 75       | Non-DT   | 25.689   | 1.054          | A         |
|             | 50            | DT       | 21.703   | 0.467          | CD        | 50       | DT       | 20.825   | 1.04           | BC        |
|             | 50            | Non-DT   | 21.536   | 0.5            | CD        | 50       | Non-DT   | 19.159   | 1.091          | BC        |
|             | 50T           | DT       | 23.913   | 0.478          | A         | 50T      | DT       | 20.232   | 1.054          | B         |
|             | 50T           | Non-DT   | 21.33    | 0.478          | D         | 50T      | Non-DT   | 17.92    | 1.054          | C         |

**Table S3 Irrigation Technology and Genetics Significant Interactions on Corn Quality – P2**

Corn quality values are shown by site-year that were significantly affected by an interaction of irrigation rate and crop genetics. Parameters and site years without significance (F test greater than 0.05) were omitted from the table. Mean separations are shown by letters.

| NDF            |          |          |          |                |           | Starch   |          |          |                |           |
|----------------|----------|----------|----------|----------------|-----------|----------|----------|----------|----------------|-----------|
|                | Factor 1 | Factor 2 | Estimate | Standard Error | Mean Sep. | Factor 1 | Factor 2 | Estimate | Standard Error | Mean Sep. |
| Logan<br>2020  | 100      | DT       | 7.95     | 0.131          | C         | 100      | DT       | 34.699   | 1.815          | AB        |
|                | 100      |          | 8.484    | 0.131          | B         | 100      | Non-DT   | 37.954   | 1.815          | A         |
|                |          | Non-DT   |          |                |           |          |          |          |                |           |
|                | 75       | DT       | 8.386    | 0.131          | B         | 75       | DT       | 32.153   | 1.815          | B         |
|                | 75       |          | 8.373    | 0.131          | B         | 75       | Non-DT   | 38.217   | 1.815          | A         |
|                |          | Non-DT   |          |                |           |          |          |          |                |           |
|                | 50       | DT       | 8.594    | 0.131          | B         | 50       | DT       | 36.912   | 1.815          | AB        |
|                | 50       |          | 9.031    | 0.131          | A         | 50       | Non-DT   | 34.713   | 1.815          | AB        |
|                |          | Non-DT   |          |                |           |          |          |          |                |           |
|                | 50T      | DT       | 8.582    | 0.131          | B         | 50T      | DT       | 35.25    | 1.815          | AB        |
| Vernal<br>2020 | 50T      |          | 8.571    | 0.131          | B         | 50T      | Non-DT   | 35.656   | 1.815          | AB        |
|                |          | Non-DT   |          |                |           |          |          |          |                |           |
|                | 100      | DT       | 8.797    | 0.398          | BCD       | 100      | DT       | 43.728   | 0.919          | BC        |
|                | 100      |          | 8.453    | 0.398          | CD        | 100      | Non-DT   | 43.695   | 0.919          | BC        |
|                |          | Non-DT   |          |                |           |          |          |          |                |           |
|                | 75       | DT       | 8.275    | 0.398          | D         | 75       | DT       | 44.7733  | 0.919          | AB        |
|                | 75       |          | 8.971    | 0.398          | ABCD      | 75       | Non-DT   | 41.567   | 0.919          | C         |
|                |          | Non-DT   |          |                |           |          |          |          |                |           |
|                | 50       | DT       | 9.542    | 0.392          | ABC       | 50       | DT       | 44.316   | 0.897          | AB        |
|                | 50       |          | 9.954    | 0.414          | A         | 50       | Non-DT   | 43.818   | 0.962          | BC        |
|                |          | Non-DT   |          |                |           |          |          |          |                |           |
|                | 50T      | DT       | 7.909    | 0.398          | D         | 50T      | DT       | 46.783   | 0.919          | A         |
|                | 50T      |          | 9.704    | 0.398          | AB        | 50T      | Non-DT   | 42.598   | 0.919          | BC        |
|                |          | Non-DT   |          |                |           |          |          |          |                |           |

**Table S4 Irrigation Technology Significance on Corn Quality – P1**

Corn quality values are shown by site-year that were significantly affected the tested factor of irrigation technology. Parameters and site years without significance (F test greater than 0.05) were omitted from the table. Mean separations are shown by letters.

| Crude Protein         |          |                |           |   | ADF    |          |                |           | NDF    |          |                |           |
|-----------------------|----------|----------------|-----------|---|--------|----------|----------------|-----------|--------|----------|----------------|-----------|
| Factor                | Estimate | Standard Error | Mean Sep. |   | Factor | Estimate | Standard Error | Mean Sep. | Factor | Estimate | Standard Error | Mean Sep. |
| Logan<br>2019         |          |                |           |   |        |          |                |           | MESA   | 8.388    | 0.134          | B         |
|                       |          |                |           |   |        |          |                |           | LESA   | 8.289    | 0.134          | B         |
|                       |          |                |           |   |        |          |                |           | MDI    | 8.131    | 0.134          | B         |
|                       |          |                |           |   |        |          |                |           | LEPA   | 8.764    | 0.134          | A         |
|                       |          |                |           |   |        |          |                |           | LENA   | 8.074    | 0.106          | B         |
| Logan<br>2020         |          |                |           |   | MESA   | 30.121   | 0.89           | A         | MESA   | 8.559    | 0.121          | ABC       |
|                       |          |                |           |   | LESA   | 30.238   | 0.89           | A         | LESA   | 8.243    | 0.121          | C         |
|                       |          |                |           |   | MDI    | 25.504   | 0.89           | C         | MDI    | 8.726    | 0.121          | A         |
|                       |          |                |           |   | LEPA   | 28.915   | 0.89           | AB        | LEPA   | 8.328    | 0.121          | BC        |
|                       |          |                |           |   | LENA   | 27.663   | 0.806          | BC        | LENA   | 8.628    | 0.1            | AB        |
| Vernal<br>2020        |          |                |           |   |        |          |                |           | MESA   | 8.049    | 0.333          | C         |
|                       |          |                |           |   |        |          |                |           | LESA   | 9.3792   | 0.332          | AB        |
|                       |          |                |           |   |        |          |                |           | MDI    | 9.7292   | 0.332          | A         |
|                       |          |                |           |   |        |          |                |           | LEPA   | 8.6454   | 0.332          | BC        |
| Vernal<br>2021        |          |                |           |   | MESA   | 14       | 1.091          | A         | MESA   | 9.79     | 0.417          | B         |
|                       |          |                |           |   | LESA   | 14.445   | 1.091          | A         | LESA   | 10.891   | 0.417          | B         |
|                       |          |                |           |   | MDI    | 6.267    | 1.091          | C         | MDI    | 12.256   | 0.427          | A         |
|                       |          |                |           |   | LEPA   | 10.136   | 1.091          | B         | LEPA   | 10.052   | 0.417          | B         |
| Cedar<br>City<br>2021 | MESA     | 23.198         | 0.51      | A | MESA   | 11.7382  | 1.292          | B         |        |          |                |           |
|                       | LESA     | 20.22          | 0.51      | B | LESA   | 17.4955  | 1.292          | A         |        |          |                |           |
|                       | LEPA     | 19.983         | 0.51      | B | LEPA   | 20.0661  | 1.292          | A         |        |          |                |           |
|                       | LENA     | 20.565         | 0.51      | B | LENA   | 18.5319  | 1.292          | A         |        |          |                |           |

**Table S5 Irrigation Technology Significance on Corn Quality – P2**

Corn quality values are shown by site-year that were significantly affected the tested factor of irrigation technology. Parameters and site years without significance (F test greater than 0.05) were omitted from the table. Mean separations are shown by letters.

| Starch                |          |                |           |   | TDN    |          |                |           | NDFD48 |          |                |           |
|-----------------------|----------|----------------|-----------|---|--------|----------|----------------|-----------|--------|----------|----------------|-----------|
| Factor                | Estimate | Standard Error | Mean Sep. |   | Factor | Estimate | Standard Error | Mean Sep. | Factor | Estimate | Standard Error | Mean Sep. |
| Logan<br>2019         |          |                |           |   | MESA   | 25.787   | 0.763          | A         |        |          |                |           |
|                       |          |                |           |   | LESA   | 23.619   | 0.763          | BC        |        |          |                |           |
|                       |          |                |           |   | MDI    | 24.426   | 0.763          | AB        |        |          |                |           |
|                       |          |                |           |   | LEPA   | 21.772   | 0.763          | C         |        |          |                |           |
|                       |          |                |           |   | LENA   | 24.552   | 0.684          | AB        |        |          |                |           |
| Logan<br>2020         |          |                |           |   |        |          |                |           | MESA   | 53.606   | 3.576          | B         |
|                       |          |                |           |   |        |          |                |           | LESA   | 67.021   | 3.576          | A         |
|                       |          |                |           |   |        |          |                |           | MDI    | 59.477   | 3.576          | AB        |
|                       |          |                |           |   |        |          |                |           | LEPA   | 63.506   | 3.576          | AB        |
|                       |          |                |           |   |        |          |                |           | LENA   | 54.369   | 3.103          | B         |
| Vernal<br>2020        |          |                |           |   | MESA   | 25.28    | 0.773          | A         |        |          |                |           |
|                       |          |                |           |   | LESA   | 25.643   | 0.771          | A         |        |          |                |           |
|                       |          |                |           |   | MDI    | 21.548   | 0.771          | B         |        |          |                |           |
|                       |          |                |           |   | LEPA   | 25.208   | 0.771          | A         |        |          |                |           |
| Vernal<br>2021        | MESA     | 48.357         | 0.79      | B | MESA   | 17.169   | 0.92           | A         |        |          |                |           |
|                       | LESA     | 48.905         | 0.79      | B | LESA   | 15.372   | 0.92           | A         |        |          |                |           |
|                       | MDI      | 51.587         | 0.802     | A | MDI    | 9.793    | 0.935          | B         |        |          |                |           |
|                       | LEPA     | 48.413         | 0.79      | B | LEPA   | 15.233   | 0.92           | A         |        |          |                |           |
| Cedar<br>City<br>2021 | MESA     | 44.416         | 0.885     | A | MESA   | 25.931   | 1.119          | B         | MESA   | 71.56    | 0.336          | B         |
|                       | LESA     | 39.084         | 0.885     | B | LESA   | 32.286   | 1.119          | A         | LESA   | 73.523   | 0.336          | A         |
|                       | LEPA     | 38.209         | 0.885     | B | LEPA   | 33.066   | 1.119          | A         | LEPA   | 73.679   | 0.336          | A         |
|                       | LENA     | 38.98          | 0.885     | B | LENA   | 32.16    | 1.119          | A         | LENA   | 73.296   | 0.336          | A         |

**Table S6 Irrigation Rate Significance on Corn Quality – P1**

Corn quality values are shown by site-year that were significantly affected by irrigation rate. Parameters and site years without significance (F test greater than 0.05) were omitted from the table. Mean separations are shown by letters.

|                    | Crude Protein |          |                |           | ADF    |          |                |           | NDF    |          |                |           |
|--------------------|---------------|----------|----------------|-----------|--------|----------|----------------|-----------|--------|----------|----------------|-----------|
|                    | Factor        | Estimate | Standard Error | Mean Sep. | Factor | Estimate | Standard Error | Mean Sep. | Factor | Estimate | Standard Error | Mean Sep. |
| Logan<br>2019      | 100           | 25.632   | 0.478          | A         | 100    | 20.636   | 0.582          | A         | 100    | 8.017    | 0.111          | B         |
|                    | 75            | 24.775   | 0.478          | AB        | 75     | 19.876   | 0.574          | AB        | 75     | 8.258    | 0.111          | B         |
|                    | 50            | 23.84    | 0.501          | B         | 50     | 18.829   | 0.61           | B         | 50     | 8.816    | 0.125          | A         |
|                    | 75T           | 24.067   | 0.478          | B         | 75T    | 16.815   | 0.574          | C         | 75T    | 8.226    | 0.111          | B         |
| Vernal<br>2021     | 100           | 23.879   | 0.436          | B         | 100    | 14.627   | 1.091          | A         | 100    | 9.764    | 0.417          | B         |
|                    | 75            | 25.119   | 0.436          | A         | 75     | 13.855   | 1.091          | A         | 75     | 10.568   | 0.417          | AB        |
|                    | 50            | 22.762   | 0.446          | B         | 50     | 7.069    | 1.091          | B         | 50     | 11.773   | 0.427          | A         |
|                    | 81T           | 23.931   | 0.436          | AB        | 87T    | 9.298    | 1.091          | B         | 87T    | 10.884   | 0.417          | AB        |
| Cedar<br>City 2021 | 100           | 20.638   | 0.51           | BC        | 100    | 20.677   | 1.292          | A         |        |          |                |           |
|                    | 75            | 22.394   | 0.51           | A         | 75     | 16.952   | 1.292          | B         |        |          |                |           |
|                    | 50            | 21.21    | 0.51           | AB        | 50     | 14.4     | 1.292          | B         |        |          |                |           |
|                    | 61T           | 19.724   | 0.51           | C         | 61T    | 15.802   | 1.292          | B         |        |          |                |           |

**Table S7 Irrigation Rate Significance on Corn Quality – P2**

Corn quality values are shown by site-year that were significantly affected by irrigation rate. Parameters and site years without significance (F test greater than 0.05) were omitted from the table. Mean separations are shown by letters.

|                    | Starch |          |                |           | TDN    |          |                |           | NDFD48 |          |                |           |
|--------------------|--------|----------|----------------|-----------|--------|----------|----------------|-----------|--------|----------|----------------|-----------|
|                    | Factor | Estimate | Standard Error | Mean Sep. | Factor | Estimate | Standard Error | Mean Sep. | Factor | Estimate | Standard Error | Mean Sep. |
| Logan<br>2019      |        |          |                |           |        |          |                |           | 100    | 69.829   | 0.316          | B         |
|                    |        |          |                |           |        |          |                |           | 75     | 70.525   | 0.316          | AB        |
|                    |        |          |                |           |        |          |                |           | 50     | 71.129   | 0.332          | A         |
|                    |        |          |                |           |        |          |                |           | 75T    | 70.985   | 0.316          | A         |
| Vernal<br>2021     | 100    | 47.273   | 0.79           | B         | 100    | 18.112   | 0.92           | A         | 100    | 71.114   | 0.287          | A         |
|                    | 75     | 50.702   | 0.79           | A         | 75     | 13.788   | 0.92           | B         | 75     | 70.297   | 0.287          | B         |
|                    | 50     | 49.775   | 0.802          | A         | 50     | 12.191   | 0.935          | B         | 50     | 71.849   | 0.294          | A         |
|                    | 87T    | 49.511   | 0.79           | AB        | 87T    | 13.476   | 0.92           | B         | 87T    | 71.078   | 0.287          | AB        |
| Cedar City<br>2021 | 100    | 38.745   | 0.885          | B         |        |          |                |           | 100    | 73.246   | 0.336          | AB        |
|                    | 75     | 42.039   | 0.885          | A         |        |          |                |           | 75     | 72.091   | 0.336          | C         |
|                    | 50     | 41.401   | 0.885          | A         |        |          |                |           | 50     | 72.872   | 0.336          | BC        |
|                    | 61T    | 38.504   | 0.885          | B         |        |          |                |           | 61T    | 73.849   | 0.336          | A         |

**Table S8 Crop Genetics Significance on Corn Quality – P1**

Corn quality values are shown by site-year that were significantly affected by corn genetics. Parameters and site years without significance (F test greater than 0.05) were omitted from the table. Mean separations are shown by letters.

| Crude Protein         |        |          |                |           | NDF    |          |                |           | Starch |          |                |           |
|-----------------------|--------|----------|----------------|-----------|--------|----------|----------------|-----------|--------|----------|----------------|-----------|
|                       | Factor | Estimate | Standard Error | Mean Sep. | Factor | Estimate | Standard Error | Mean Sep. | Factor | Estimate | Standard Error | Mean Sep. |
| Logan<br>2020         | DT     | 21.877   | 0.214          | A         |        |          |                |           |        |          |                |           |
|                       | Non-DT | 21.312   | 0.214          | B         |        |          |                |           |        |          |                |           |
| Vernal<br>2020        |        |          |                |           |        |          |                |           |        |          |                |           |
| Vernal<br>2021        | DT     | 24.954   | 0.312          | A         | DT     | 10.229   | 0.288          | B         | DT     | 49.91    | 0.484          | A         |
|                       | Non-DT | 22.892   | 0.308          | B         | Non-DT | 11.265   | 0.284          | A         | Non-DT | 48.721   | 0.479          | B         |
| Cedar<br>City<br>2021 |        |          |                |           | DT     | 8.488    | 0.113          | B         |        |          |                |           |
|                       |        |          |                |           | Non-DT | 9.025    | 0.113          | A         |        |          |                |           |



**Table S9 Crop Genetics Significance on Corn Quality – P2**

Corn quality values are shown by site-year that were significantly affected by corn genetics.. Parameters and site years without significance (F test greater than 0.05) were omitted from the table. Mean separations are shown by letters.

| TDN         |        |          |                |           | NDFD48 |          |                |           |
|-------------|--------|----------|----------------|-----------|--------|----------|----------------|-----------|
|             | Factor | Estimate | Standard Error | Mean Sep. | Factor | Estimate | Standard Error | Mean Sep. |
| Vernal 2020 | DT     | 23.087   | 0.476          | B         |        |          |                |           |
|             | Non-DT | 25.753   | 0.484          | A         |        |          |                |           |
| Vernal 2021 | DT     | 12.896   | 0.565          | B         | DT     | 70.406   | 0.205          | B         |
|             | Non-DT | 15.887   | 0.559          | A         | Non-DT | 71.764   | 0.203          | A         |
